# Supplementary material for: Structural connectivity of right frontal hyperactive areas scales with stuttering severity
Source: PubMed Central journal article supplement — Brain. 2017 Dec 8;141(1):191–204. doi: 10.1093/brain/awx316 (PMC5837552; doi:10.1093/brain/awx316), 2017-12-08
Supplement: brain-2017-00337-file007_awx316.pdf [file brain-2017-00337-file007_awx316.pdf]

# Structural connectivity of right frontal hyperactive areas scales with stuttering severity

Nicole E. Neef, Alfred Anwander, Christoph Bütfering, Angela D. Friederici, Walter Paulus, and Martin Sommer

## Supplementary material

**Supplementary Table 1 Individual characteristics of control participants**

| ID  | Sex | Age | LQ  | Edu | History | %SS |
|-----|-----|-----|-----|-----|---------|-----|
| C1  | m   | 24  | 100 | 4   | none    | 0   |
| C2  | m   | 26  | 100 | 5   | none    | 0.3 |
| C3  | m   | 52  | 100 | 6   | none    | 0   |
| C4  | m   | 36  | 100 | 6   | none    | 0   |
| C5  | m   | 25  | 80  | 5   | none    | 0   |
| C6  | m   | 26  | 80  | 5   | none    | 0.4 |
| C7  | m   | 36  | 100 | 6   | none    | 0   |
| C8  | m   | 27  | 100 | 6   | none    | 0   |
| C9  | m   | 23  | 100 | 4   | none    | 0   |
| C10 | m   | 47  | 75  | 1   | none    | 0.1 |
| C11 | m   | 39  | 100 | 5   | none    | 0.1 |
| C12 | m   | 56  | 100 | 6   | none    | 0.1 |
| C13 | m   | 53  | 95  | 2   | none    | 0.1 |
| C14 | m   | 30  | 100 | 6   | none    | 0   |
| C15 | m   | 20  | 95  | 3   | none    | 0   |
| C16 | m   | 57  | 100 | 1   | none    | 0   |
| C17 | m   | 62  | 100 | 6   | none    | 0.4 |
| C18 | f   | 24  | 100 | 3   | none    | 0   |
| C19 | f   | 24  | 80  | 3   | none    | 0   |
| C20 | f   | 24  | 100 | 4   | none    | 0   |
| C21 | f   | 27  | 100 | 6   | none    | 0   |
| C22 | f   | 27  | 80  | 6   | none    | 0   |
| C23 | f   | 22  | 80  | 3   | none    | 0   |
| C24 | f   | 42  | 100 | 1   | none    | 0   |
| C25 | f   | 35  | 100 | 6   | none    | 0   |
| C26 | f   | 48  | 100 | 2   | none    | 0   |
| C27 | f   | 28  | 75  | 3   | none    | 0   |
| C28 | f   | 57  | 100 | 1   | none    | 0.2 |
| C29 | f   | 51  | 100 | 1   | none    | 0   |
| C30 | f   | 49  | 95  | 1   | none    | 0   |
| C31 | f   | 29  | 100 | 4   | none    | 0   |
| C32 | f   | 46  | 95  | 1   | none    | 0   |
| C33 | f   | 42  | 100 | 1   | none    | 0   |
| C34 | f   | 46  | 100 | 1   | none    | 0   |

LQ = laterality quotient (Oldfield, 1971), Edu = education, History = family history of stuttering, %SS = stuttered syllables occurring per 100 syllables across 1000 syllables (reading and free production)

**Supplementary Table 2 Individual characteristics of adults who stutter**

| ID  | Sex | Age | LQ  | Edu | History  | ASO | SSI-4 |     |             | OASES |      |      |      |       |      |                    |
|-----|-----|-----|-----|-----|----------|-----|-------|-----|-------------|-------|------|------|------|-------|------|--------------------|
|     |     |     |     |     |          |     | %SS   | SSI | Severity    | GI    | RS   | CDS  | QL   | Total | Miss | Severity           |
| S1  | m   | 27  | 80  | 5   | m        | 6   | 1.3   | 8   | disclosed*  | 53.0  | 48.0 | 53.3 | 30.8 | 46.3  | 1    | moderate           |
| S2  | m   | 23  | 80  | 3   | none     | 4   | 69.6  | 40  | very severe | 72.0  | 83.3 | 90.0 | 75.8 | 80.3  | 1    | severe             |
| S3  | m   | 50  | 100 | 6   | u        | 4   | 3.9   | 14  | very mild   | 27.0  | 0.0  | 0.0  | 0.0  | 6.8   | 90   | n/a                |
| S4  | m   | 63  | 70  | 6   | u        | 6   | 2.4   | 12  | very mild   | 45.0  | 39.3 | 36.7 | 32.5 | 38.4  | 0    | mild-to-moderate   |
| S5  | m   | 36  | 60  | 1   | f, c     | 5   | 3     | 19  | mild        | 40.0  | 28.7 | 26.7 | 25.8 | 30.3  | 0    | mild-to-moderate   |
| S6  | m   | 42  | 100 | 6   | b        | 4   | 1     | 10  | very mild   | 45.0  | 44.7 | 48.3 | 39.2 | 44.3  | 1    | mild-to-moderate   |
| S7  | m   | 27  | 100 | 5   | b        | 9   | 2.3   | 19  | mild        | 56.0  | 52.7 | 53.3 | 59.2 | 55.3  | 1    | moderate           |
| S8  | m   | 52  | 95  | 6   | n/a      | 3   | 0.9   | 4   | disclosed*  | 56.0  | 63.3 | 44.2 | 54.2 | 54.4  | 0    | moderate           |
| S9  | m   | 26  | 100 | 4   | gm       | 4   | 2.4   | 13  | very mild   | 49.0  | 48.0 | 51.7 | 48.3 | 49.3  | 0    | moderate           |
| S10 | m   | 47  | 100 | 6   | m, gm    | 4   | 0.8   | 7   | disclosed*  | 41.0  | 39.3 | 30.8 | 28.3 | 34.9  | 0    | mild-to-moderate   |
| S11 | m   | 55  | 100 | 1   | none     | 4   | 1.5   | 12  | very mild   | 49.0  | 56.7 | 50.0 | 45.0 | 50.2  | 1    | moderate           |
| S12 | m   | 19  | 75  | 1   | none     | 5   | 2.3   | 11  | very mild   | 52.0  | 56.0 | 55.8 | 65.0 | 57.2  | 1    | moderate           |
| S13 | m   | 30  | 90  | 6   | none     | 3   | 49.1  | 43  | very severe | 56.0  | 54.7 | 40.0 | 35.0 | 46.4  | 3    | moderate           |
| S14 | m   | 38  | 95  | 6   | f        | 3   | 7.9   | 22  | mild        | 43.0  | 58.0 | 61.7 | 47.5 | 52.5  | 1    | moderate           |
| S15 | m   | 38  | 100 | 6   | none     | 4   | 0.2   | 0   | disclosed*  | 61.0  | 40.0 | 48.3 | 37.5 | 46.7  | 1    | moderate           |
| S16 | m   | 24  | 100 | 4   | f, b     | 4   | 12.0  | 34  | severe      | 59.0  | 55.3 | 51.7 | 40.0 | 51.5  | 10   | moderate           |
| S17 | f   | 22  | 100 | 3   | f        | 3   | 23.3  | 36  | severe      | 53.0  | 45.3 | 53.3 | 36.7 | 47.1  | 1    | moderate           |
| S18 | f   | 25  | 100 | 4   | u        | 3   | 1.3   | 7   | disclosed*  | 58.0  | 67.3 | 72.5 | 61.7 | 64.9  | 0    | moderate-to-severe |
| S19 | f   | 47  | 100 | 6   | n, c     | 3   | 0.1   | 0   | disclosed*  | 32.0  | 25.3 | 25.0 | 21.7 | 26.0  | 0    | mild               |
| S20 | f   | 20  | 100 | 1   | a        | 4   | 3.3   | 17  | very mild   | 47.0  | 38.7 | 45.0 | 32.5 | 40.8  | 3    | mild-to-moderate   |
| S21 | f   | 30  | 100 | 1   | none     | 4   | 13.1  | 31  | moderate    | 57.0  | 58.0 | 60.8 | 54.2 | 57.5  | 1    | moderate           |
| S22 | f   | 32  | 90  | 1   | none     | 5   | 9.8   | 20  | mild        | 27.0  | 24.7 | 25.0 | 22.5 | 24.8  | 0    | mild               |
| S23 | f   | 22  | 70  | 5   | f, b     | 1   | 2.2   | 13  | very mild   | 33.0  | 41.3 | 33.3 | 26.7 | 33.6  | 1    | mild-to-moderate   |
| S24 | f   | 50  | 85  | 6   | f        | 5   | 0.3   | 0   | disclosed   | 48.0  | 63.3 | 62.5 | 51.7 | 56.4  | 1    | moderate           |
| S25 | f   | 43  | 100 | 6   | gc       | 9   | 1.2   | 12  | very mild   | 35.0  | 34.0 | 26.7 | 21.7 | 29.3  | 0    | mild-to-moderate   |
| S26 | f   | 38  | 100 | 6   | C        | 3   | 4.2   | 25  | moderate    | 54.0  | 51.3 | 60.0 | 49.2 | 53.6  | 1    | moderate           |
| S27 | f   | 58  | 100 | 6   | f, b     | 2   | 10.9  | 22  | mild        | 39.0  | 48.7 | 48.3 | 36.7 | 43.2  | 0    | mild-to-moderate   |
| S28 | f   | 52  | 100 | 6   | f, b     | 7   | 0.5   | 4   | disclosed*  | 47.0  | 47.3 | 44.2 | 45.0 | 45.9  | 1    | moderate           |
| S29 | f   | 29  | 100 | 6   | f, u     | 4   | 7.5   | 21  | mild        | 51.0  | 43.3 | 26.7 | 28.3 | 37.3  | 0    | mild-to-moderate   |
| S30 | f   | 36  | 100 | 1   | u, s     | 3   | 1.8   | 14  | very mild   | 52.0  | 54.0 | 50.0 | 51.7 | 51.9  | 1    | moderate           |
| S31 | f   | 36  | 80  | 1   | m, u, ch | 5   | 3.8   | 24  | mild        | 43.0  | 40.0 | 36.7 | 25.0 | 36.2  | 2    | mild-to-moderate   |

LQ = laterality quotient (Oldfield, 1971); Edu = education; History = family history of stuttering, m = mother, f = father, b = brother, s = son, ch = children, gm = grandmother, gf = grandfather, u = uncle, a = aunt, n = nephew, c = cousin, gc = grand; ASO = age of stuttering onset in years; %SS = stuttered syllables occurring per 100 syllables across 1000 syllables (reading and free production), SSI = total score in the stuttering severity index (SSI-4), \*disclosed = SSI-4 does not give a diagnosis of stuttering but participants reported their history

of stuttering and disclosed continuing stuttering; OASES = Overall Assessment of Speaker's Experience of Stuttering (Yaruss and Quesal, 2006), given are impact scores of all subsections: GI = general information, RS = reaction to stuttering, CDS = communication in daily life, QL = quality of life, Total = total impact score, Miss = items not completed out of 100.

**Supplementary Table 3 Brain activation across all participants in speaking > humming**

| Brain area                                | MNI-coordinates |     |     | Extent<br>(voxels) | z-score<br>( $z > 3.5, \alpha < 0.05$ ) |
|-------------------------------------------|-----------------|-----|-----|--------------------|-----------------------------------------|
|                                           | x               | y   | z   |                    |                                         |
| R Anterior intra-parietal sulcus (hIP1)   | 38              | -56 | 46  | 2116               | 7.06                                    |
| ➤ R Inferior parietal lobule (PF)         | 50              | -36 | 44  |                    | 6.85                                    |
| ➤ R Inferior parietal lobule (PGp)        | 42              | -76 | 38  |                    | 6.64                                    |
| L Premotor cortex (BA 6)                  | -52             | -6  | 40  | 1920               | 7.58                                    |
| ➤ L Primary motor cortex (BA 4p)          | -54             | -4  | 30  |                    | 6.63                                    |
| ➤ L Inferior frontal cortex (BA 44)       | -40             | 2   | 28  |                    | 6.43                                    |
| R Paracingualte gyrus                     | 10              | 16  | 48  | 1031               | 6.85                                    |
| ➤ L Supplementary motor area (BA 6)       | -6              | 4   | 56  |                    | 6.67                                    |
| L Middle temporal gyrus                   | -48             | -46 | 8   | 745                | 7.32                                    |
| ➤ L Superior temporal gyrus               | -66             | -18 | 6   |                    | 5.74                                    |
| L Anterior intra-parietal sulcus (hIP3)   | -30             | -54 | 42  | 673                | 6.82                                    |
| ➤ L Anterior intra-parietal sulcus (hIP2) | -46             | -38 | 40  |                    | 6.29                                    |
| ➤ L Inferior parietal lobule (PGp)        | -32             | -74 | 36  |                    | 4.83                                    |
| R Middle frontal gyrus                    | 34              | 2   | 56  | 517                | 6.87                                    |
| R Insula                                  | 32              | 20  | 2   | 422                | 6.66                                    |
| R Frontal pole                            | 38              | 36  | 32  | 342                | 5.57                                    |
| ➤ R Middle frontal gyrus (BA 9)           | 40              | 38  | 28  |                    | 5.56                                    |
| R Inferior temporal gyrus                 | 56              | -44 | -12 | 204                | 5.97                                    |
| ➤ R Middle temporal gyrus, posterior      | 64              | -28 | -10 |                    | 4.97                                    |
| R Cerebellum, VI                          | 18              | -58 | -26 | 155                | 6.44                                    |
| L Inferior temporal gyrus                 | -52             | -56 | -12 | 155                | 5.86                                    |
| R primary motor cortex (BA 4p)            | 48              | -8  | 38  | 143                | 5.37                                    |
| ➤ R Somatosensory cortex (BA 3a)          | 46              | -10 | 30  |                    | 4.68                                    |
| R Occipital pole                          | 20              | -94 | 4   | 111                | 6.18                                    |
| R Thalamus                                | 12              | -14 | 12  | 89                 | 5.23                                    |
| L Thalamus                                | -12             | -16 | 10  | 86                 | 5.35                                    |

**Supplementary Table 4 Brain activation across all participants in humming > speaking**

| Brain area                                      | MNI-coordinates |     |     | Extent (voxels) | z-score<br>( $z > 3.5, \alpha < 0.05$ ) |
|-------------------------------------------------|-----------------|-----|-----|-----------------|-----------------------------------------|
|                                                 | x               | y   | z   |                 |                                         |
| L Lateral occipital cortex                      | -24             | -88 | 18  | 4404            | 8.96                                    |
| ➤ L Occipital fusiform gyrus                    | -14             | -86 | -10 |                 | 8.44                                    |
| R Lateral occipital cortex                      | 36              | -76 | 14  | 1435            | 8.16                                    |
| ➤ R Occipital pole                              |                 |     |     |                 |                                         |
| L Frontal orbital cortex                        | -40             | 32  | -14 | 1377            | 7.1                                     |
| ➤ L Frontal orbital cortex                      | -44             | 32  | -12 |                 | 7.01                                    |
| ➤ L Inferior frontal gyrus (BA 45)              | -46             | 46  | 0   |                 | 6.87                                    |
| L Middle frontal gyrus                          | -28             | 26  | 50  | 802             | 6.02                                    |
| ➤ L Superior frontal gyrus                      | -24             | 34  | 48  |                 | 5.6                                     |
| L Frontal pole                                  | -6              | 58  | 18  | 750             | 6.09                                    |
| ➤ L Frontal medial cortex                       | -2              | 50  | -8  |                 | 5.6                                     |
| ➤ L Paracingulate gyrus                         | -4              | 54  | 2   |                 | 5.46                                    |
| L Planum polare/primary auditory cortex (TE1.2) | -50             | 0   | -4  | 617             | 6.76                                    |
| ➤ L temporal pole                               | -34             | 6   | -20 |                 | 6.61                                    |
| ➤ L Insula                                      | -40             | -8  | -8  |                 | 6.02                                    |
| ➤ L Frontal orbital cortex                      | -28             | 14  | 24  |                 | 4.83                                    |
| L Precuneus                                     | -8              | -50 | 38  | 528             | 5.91                                    |
| ➤ L Cingulate gyrus, posterior                  | -4              | -52 | 26  |                 | 5.28                                    |
| L Occipital fusiform gyrus                      | 26              | -64 | -8  | 526             | 6.98                                    |
| ➤ L Temporal occipital fusiform cortex          | 28              | -56 | -10 |                 | 6.33                                    |
| L Inferior parietal lobule (PFm)                | -44             | -58 | 28  | 478             | 5.55                                    |
| ➤ L Inferior parietal lobule (PFm)              | -56             | -54 | 38  |                 | 5.45                                    |
| ➤ L Inferior parietal lobule (PGa)              | -50             | -56 | 28  |                 | 5.41                                    |
| R Inferior frontal gyrus (BA45)                 | 52              | 34  | 4   | 178             | 7.42                                    |
| R Insula                                        | 40              | 6   | -16 | 118             | 5.62                                    |
| ➤ R Temporal pole                               | 54              | 10  | -14 |                 | 5.55                                    |
| L Cingulate gyrus, anterior                     | 0               | -12 | 40  | 84              | 5.6                                     |

**Supplementary Table 5 Brain activation in controls in speaking > humming**

| Brain area                                | MNI-coordinates |     | Extent (voxels) | z-score<br>( $z > 3.5, \alpha < 0.05$ ) |      |
|-------------------------------------------|-----------------|-----|-----------------|-----------------------------------------|------|
|                                           | x               | y   |                 |                                         |      |
| L Middle temporal gyrus                   | -50             | -48 | 6               | 3645                                    | 6.78 |
| ➤ L Primary somatosensory cortex (BA 3b)  | -50             | -12 | 42              |                                         | 5.86 |
| ➤ L Primary motor cortex (BA 4p)          | -54             | -2  | 28              |                                         | 5.45 |
| ➤ L Premotor cortex (BA 6)                | -54             | 2   | 24              |                                         | 5.43 |
| ➤ L Superior temporal gyrus, posterior    | -54             | -30 | 4               |                                         | 5.11 |
| R Inferior parietal lobule (PFm)          | 48              | -40 | 44              | 2381                                    | 5.38 |
| ➤ R Inferior parietal lobule PGp          | 36              | -74 | 46              |                                         | 5.34 |
| ➤ R Anterior intra-parietal sulcus (hIP3) | 34              | -58 | 42              |                                         | 4.98 |
| L Supplementary motor area (BA 6)         | -4              | 6   | 52              | 1034                                    | 5.46 |
| ➤ L Paracingulate gyrus                   | -6              | 16  | 40              |                                         | 3.95 |
| ➤ R Paracingulate gyrus                   | 6               | 16  | 48              |                                         | 5.22 |
| L Inferior parietal lobule (Pga)          | -30             | -66 | 46              | 690                                     | 5.57 |
| ➤ L anterior intra-parietal sulcus (hIP3) | -30             | -52 | 44              |                                         | 4.99 |
| ➤ L anterior intra-parietal sulcus (hIP2) | -46             | -38 | 40              |                                         | 4.67 |
| ➤ L anterior intra-parietal sulcus (hIP1) | -32             | -46 | 36              |                                         | 4.3  |
| ➤ L Inferior parietal lobule PGp          | -32             | -70 | 36              |                                         | 3.75 |
| ➤ L Primary somatosensory cortex (BA 1)   | -52             | -30 | 56              |                                         | 3.6  |
| R Middle frontal gyrus                    | 32              | 2   | 60              | 354                                     | 4.8  |
| L Inferior temporal gyrus                 | -56             | -58 | -16             | 312                                     | 5.37 |
| R Inferior temporal gyrus                 | 64              | -52 | -16             | 232                                     | 5.18 |
| ➤ R Middle temporal gyrus, posterior      | 62              | -36 | -14             |                                         | 3.63 |
| R Insula                                  | 32              | 20  | 8               | 173                                     | 4.39 |
| R Precuneus                               | 10              | -68 | 48              | 165                                     | 4.97 |
| L Thalamus                                | -8              | -14 | 14              | 200                                     | 4.54 |
| R Thalamus                                | 10              | 22  | 14              | 253                                     | 4.58 |
| R Cerebellum (VI)                         | 18              | -60 | -24             | 335                                     | 4.95 |

**Supplementary Table 6 Brain activation in controls in humming > speaking**

| Brain area                                      | MNI-coordinates |     |     | Extent (voxels) | z-score<br>( $z > 3.5, \alpha < 0.05$ ) |
|-------------------------------------------------|-----------------|-----|-----|-----------------|-----------------------------------------|
|                                                 | x               | y   | z   |                 |                                         |
| L Lateral occipital cortex                      | -24             | -86 | 20  | 5546            | 6.85                                    |
| ➤ L Occipital fusiform gyrus                    | -16             | -86 | -12 |                 | 6.18                                    |
| R Lateral occipital cortex                      | 34              | -78 | 14  | 1954            | 6.58                                    |
| ➤ R Occipital pole                              | 12              | -92 | 14  |                 | 5.38                                    |
| L Frontal orbital cortex                        | -24             | 32  | -12 | 1734            | 5.92                                    |
| ➤ L Frontal pole                                | -48             | 48  | -2  |                 | 5.21                                    |
| L Planum polare/primary auditory cortex (TE1.2) | -50             | 0   | -4  | 813             | 5.71                                    |
| ➤ L Temporal pole                               | -34             | 6   | -18 |                 | 4.94                                    |
| ➤ L Parahippocampal gyrus/Amygdala superficial  | -26             | 2   | -22 |                 | 4.51                                    |
| ➤ L Temporal fusiform cortex                    | -32             | -2  | -36 |                 | 4.11                                    |
| R Temporal occipital fusiform cortex            | 30              | -56 | -8  | 701             | 5.34                                    |
| L Frontal pole                                  | -10             | 60  | 18  | 615             | 4.75                                    |
| ➤ L Frontal medial cortex                       | -4              | 50  | -8  |                 | 3.99                                    |
| R Inferior frontal gyrus (BA 45)                | 50              | 34  | 6   | 587             | 5.95                                    |
| ➤ R Frontal pole                                | 40              | 34  | -10 |                 | 4.59                                    |
| R Inferior parietal lobule (PF)                 | 60              | -26 | 30  | 527             | 4.88                                    |
| ➤ R Superior temporal gyrus, posterior          | 66              | -32 | 16  |                 | 3.72                                    |
| R Temporal pole                                 | 38              | 6   | -18 | 256             | 4.41                                    |
| ➤ R Parahippo gyrus/Hippo entorhinal cortex     | 28              | -2  | -34 |                 | 4.05                                    |
| ➤ R Amygdala, superficial                       | 30              | 4   | -28 |                 | 3.71                                    |
| ➤ R Amygdala, laterobasal                       | 26              | -6  | -20 |                 | 3.66                                    |

**Supplementary Table 7 Brain activation in AWS in speaking > humming**

| Brain area                                | MNI-coordinates |     |     | Extent<br>(voxels) | z-score<br>( $z > 3.5, \alpha < 0.05$ ) |
|-------------------------------------------|-----------------|-----|-----|--------------------|-----------------------------------------|
|                                           | x               | y   | z   |                    |                                         |
| R Anterior intra-parietal sulcus (hIP3)   | 40              | -54 | 48  | 1651               | 5.39                                    |
| ➤ R Inferior parietal lobule (PF)         | 52              | -36 | 44  |                    | 4.93                                    |
| ➤ R Anterior intra-parietal sulcus (hIP1) | 44              | -42 | 44  |                    | 4.69                                    |
| ➤ R Inferior parietal lobule (PGp)        | 42              | -76 | 38  |                    | 4.67                                    |
| ➤ R Anterior intra-parietal sulcus (hIP2) | 44              | -38 | 48  |                    | 4.63                                    |
| R Middle frontal gyrus                    | 34              | 4   | 56  | 1477               | 4.96                                    |
| ➤ R Paracingulate gyrus                   | 10              | 16  | 48  |                    | 4.84                                    |
| ➤ L Supplementary motor area              | -8              | 0   | 58  |                    | 4.81                                    |
| ➤ R Superior frontal gyrus                | 22              | 10  | 58  |                    | 4.26                                    |
| R Insula                                  | 32              | 20  | 2   | 1359               | 5.06                                    |
| ➤ R Inferior frontal gyrus (BA 44)        | 50              | 6   | 30  |                    | 4.93                                    |
| ➤ R Frontal operculum cortex              | 34              | 18  | 12  |                    | 4.6                                     |
| ➤ R Primary motor cortex (BA 4p)          | 46              | -8  | 38  |                    | 4.42                                    |
| ➤ R Inferior frontal gyrus (BA 44)        | 52              | 10  | 14  |                    | 4.25                                    |
| R Frontal pole                            | 36              | 46  | 0   | 1342               | 4.88                                    |
| ➤ R Middle frontal gyrus (BA 9)           | 36              | 38  | 32  |                    | 4.14                                    |
| L Premotor cortex (BA 6)                  | -54             | -6  | 40  | 1233               | 5.32                                    |
| L Anterior intra-parietal sulcus (hIP3)   | -28             | -54 | 40  | 666                | 5.17                                    |
| ➤ L Anterior intra-parietal sulcus (hIP1) | -34             | -54 | 44  |                    | 5.07                                    |
| ➤ L Anterior intra-parietal sulcus (hIP2) | -48             | -38 | 40  |                    | 4.29                                    |
| L Superior temporal gyrus, posterior      | -50             | -42 | 8   | 494                | 5.46                                    |
| ➤ L Inferior temporal gyrus               | -50             | -52 | -12 |                    | 4.44                                    |
| R Middle temporal gyrus, posterior        | 64              | -28 | -10 | 274                | 4.52                                    |
| L Insula                                  | -32             | 16  | 8   | 199                | 4.17                                    |



**Supplementary Table 8 Brain activation in AWS in humming > speaking**

| Brain area                                        | MNI-coordinates |     | Extent (voxels) | z-score<br>( $z > 3.5, \alpha < 0.05$ ) |      |
|---------------------------------------------------|-----------------|-----|-----------------|-----------------------------------------|------|
|                                                   | x               | y   |                 |                                         |      |
| L Occipital fusiform gyrus                        | -18             | -80 | -10             | 3172                                    | 7.22 |
| ➤ L Occipital pole                                | -26             | -90 | 16              |                                         | 6.14 |
| ➤ L Lateral occipital cortex                      | -34             | -88 | 12              |                                         | 5.56 |
| L Middle frontal gyrus                            | -28             | 28  | 48              | 2324                                    | 4.91 |
| ➤ L Paracingulate gyrus                           | -6              | 54  | 22              |                                         | 4.78 |
| ➤ L Superior frontal gyrus                        | -20             | 32  | 50              |                                         | 4.78 |
| L Frontal orbital cortex                          | -46             | 30  | -12             | 1478                                    | 4.93 |
| ➤ L Temporal pole                                 | -40             | 4   | -18             |                                         | 4.73 |
| ➤ L Inferior frontal gyrus (BA 45)                | -46             | 46  | 0               |                                         | 4.69 |
| ➤ L Inferior frontal gyrus (BA 45)                | -52             | 34  | 6               |                                         | 4.36 |
| ➤ L Planum polare/primary auditory cortex (TE1.2) | -52             | 0   | -4              |                                         | 4.39 |
| L Precuneus                                       | -8              | -44 | 40              | 1068                                    | 5.57 |
| ➤ L Cingulate gyrus, posterior                    | -4              | -48 | 24              |                                         | 3.97 |
| L Inferior parietal lobule (PFm)                  | -54             | -56 | 46              | 911                                     | 5.05 |
| ➤ L Inferior parietal lobule (Pga)                | -54             | -60 | 42              |                                         | 4.96 |
| R Lateral occipital cortex                        | 38              | -78 | 14              | 861                                     | 5.17 |
| ➤ R Occipital pole                                | 10              | -92 | 12              |                                         | 3.89 |
| R Occipital fusiform gyrus                        | 26              | -68 | -8              | 479                                     | 4.96 |
| ➤ R Lingual cortex                                | 20              | -42 | -14             |                                         | 3.95 |
| R Temporal pole                                   | 56              | 10  | -14             | 333                                     | 5.2  |
| L Lateral occipital cortex                        | -10             | -84 | 42              | 175                                     | 4.39 |

## **Supplementary discussion on the lack of a hypo-activity of the left posterior IFG in adults who stutter compared to fluent speakers**

In our previous study, where we used the same paradigm, we report and discuss a hypo-activation of the left posterior IFG in adults who stutter compared to fluent speakers (Neef *et al.*, 2016). It is important to note that there were essential differences between the current study and our previous study. (1) In this previous study, the differences of activity in the IFG resulted from region of interest analyses separated for imagining humming and imagining speaking. However, the whole-brain analysis, which requires a more stringent correction for multiple testing, resulted in no group differences. (2) Furthermore, in the previous study we analyzed data from 17 fluently speaking males and 16 males who stutter. In the current study we have more power because we analyze data from 31 adults who stutter and 34 fluent speakers. This might be the primary reason why a whole-brain analysis yielded hyperactivity in the right hemisphere of adults who stutter when compared to fluent speakers.

## **References**

- Neef NE, Bütfering C, Anwander A, Friederici AD, Paulus W, Sommer M. Left posterior-dorsal area 44 couples with parietal areas to promote speech fluency, while right area 44 activity promotes the stopping of motor responses. *NeuroImage* 2016; 142: 628–644.
- Oldfield RC. The assessment and analysis of handedness: The Edinburgh inventory. *Neuropsychologia* 1971; 9: 97–113.
- Yaruss JS, Quesal RW. Overall Assessment of the Speaker's Experience of Stuttering (OASES): documenting multiple outcomes in stuttering treatment. *J. Fluen. Disord.* 2006; 31: 90–115.
